# Supplementary material
Source: Frontiers journal article supplement (https://www.frontiersin.org/articles/435091)
Supplement: Data_Sheet_3.zip [file Data_Sheet_3.zip]

## Sheet: target35%
	count_contigs		count_read
						Target concentration
							cluster7	cluster30	cluster31	cluster36	cluster38	cluster60	cluster61
						target concentration_contig
						target concentration_read

## Sheet: target65%
	count_contigs		count_read
cluster0		cluster0
BS	0	BS	0
cluster1		cluster1				Target concentration
BS	0	BS	0				cluster4	cluster8	cluster12	cluster16	cluster18	cluster19	cluster25	cluster34	cluster37	cluster39	cluster45	cluster48	cluster50
cluster2		cluster2				target concentration_contig	0.0006	0.0017	0.0045	0.005	0.0011	0.0006	0.0128	0.0056	0.0123	0.0011	0.0039	0.0006	0.9504
BS	0	BS	0			target concentration_read	2e-06	0.000676	3.2e-05	1.5e-05	3e-06	1e-06	6.4e-05	2.8e-05	0.000341	4.1e-05	0.000143	2e-06	0.998652
cluster3		cluster3
BS	0	BS	0
cluster4		cluster4
BS	1	BS	17
cluster5		cluster5
BS	0	BS	0
cluster6		cluster6
BS	0	BS	0
cluster7		cluster7
BS	0	BS	0
cluster8		cluster8
BS	3	BS	6169
cluster9		cluster9
BS	0	BS	0
cluster10		cluster10
BS	0	BS	0
cluster11		cluster11
BS	0	BS	0
cluster12		cluster12
BS	8	BS	292
cluster13		cluster13
BS	0	BS	0
cluster14		cluster14
BS	0	BS	0
cluster15		cluster15
BS	0	BS	0
cluster16		cluster16
BS	9	BS	136
cluster17		cluster17
BS	0	BS	0
cluster18		cluster18
BS	2	BS	26
cluster19		cluster19
BS	1	BS	9
cluster20		cluster20
BS	0	BS	0
cluster21		cluster21
BS	0	BS	0
cluster22		cluster22
BS	0	BS	0
cluster23		cluster23
BS	0	BS	0
cluster24		cluster24
BS	0	BS	0
cluster25		cluster25
BS	23	BS	586
cluster26		cluster26
BS	0	BS	0
cluster27		cluster27
BS	0	BS	0
cluster28		cluster28
BS	0	BS	0
cluster29		cluster29
BS	0	BS	0
cluster30		cluster30
BS	0	BS	0
cluster31		cluster31
BS	0	BS	0
cluster32		cluster32
BS	0	BS	0
cluster33		cluster33
BS	0	BS	0
cluster34		cluster34
BS	10	BS	258
cluster35		cluster35
BS	0	BS	0
cluster36		cluster36
BS	0	BS	0
cluster37		cluster37
BS	22	BS	3113
cluster38		cluster38
BS	0	BS	0
cluster39		cluster39
BS	2	BS	375
cluster40		cluster40
BS	0	BS	0
cluster41		cluster41
BS	0	BS	0
cluster42		cluster42
BS	0	BS	0
cluster43		cluster43
BS	0	BS	0
cluster44		cluster44
BS	0	BS	0
cluster45		cluster45
BS	7	BS	1307
cluster46		cluster46
BS	0	BS	0
cluster47		cluster47
BS	0	BS	0
cluster48		cluster48
BS	1	BS	17
cluster49		cluster49
BS	0	BS	0
cluster50		cluster50
BS	1706	BS	9118400
cluster51		cluster51
BS	0	BS	0
cluster52		cluster52
BS	0	BS	0
cluster53		cluster53
BS	0	BS	0
cluster54		cluster54
BS	0	BS	0
	1795	0	9130705

## Sheet: target95%
	count_contigs		count_read
cluster0		cluster0
BS	0	BS	0
cluster1		cluster1				Target concentration
BS	0	BS	0				cluster9	cluster19	cluster20	cluster21	cluster28
cluster2		cluster2				target concentration_contig	0.0021	0.0043	0.0384	0.0597	0.8955
BS	0	BS	0			target concentration_read	1e-06	0.000361	0.004169	0.00053	0.994939
cluster3		cluster3
BS	0	BS	0
cluster4		cluster4
BS	0	BS	0
cluster5		cluster5
BS	0	BS	0
cluster6		cluster6
BS	0	BS	0
cluster7		cluster7
BS	0	BS	0
cluster8		cluster8
BS	0	BS	0
cluster9		cluster9
BS	1	BS	6
cluster10		cluster10
BS	0	BS	0
cluster11		cluster11
BS	0	BS	0
cluster12		cluster12
BS	0	BS	0
cluster13		cluster13
BS	0	BS	0
cluster14		cluster14
BS	0	BS	0
cluster15		cluster15
BS	0	BS	0
cluster16		cluster16
BS	0	BS	0
cluster17		cluster17
BS	0	BS	0
cluster18		cluster18
BS	0	BS	0
cluster19		cluster19
BS	2	BS	4104
cluster20		cluster20
BS	18	BS	47330
cluster21		cluster21
BS	28	BS	6016
cluster22		cluster22
BS	0	BS	0
cluster23		cluster23
BS	0	BS	0
cluster24		cluster24
BS	0	BS	0
cluster25		cluster25
BS	0	BS	0
cluster26		cluster26
BS	0	BS	0
cluster27		cluster27
BS	0	BS	0
cluster28		cluster28
BS	420	BS	11295706
cluster29		cluster29
BS	0	BS	0
cluster30		cluster30
BS	0	BS	0
cluster31		cluster31
BS	0	BS	0
cluster32		cluster32
BS	0	BS	0
cluster33		cluster33
BS	0	BS	0
cluster34		cluster34
BS	0	BS	0
	469	0	11353162

## Sheet: targetM%
	count_contigs		count_read
						Target concentration
							cluster1	cluster2	cluster7	cluster15	cluster20	cluster21	cluster41	cluster43	cluster46	cluster47	cluster50	cluster61	cluster76	cluster81
						target concentration_contig
						target concentration_read
